# Supplementary material for: Roxborough Park Community Wildfire Evacuation Drill: Data Collection and Model Benchmarking
Source: Springer Nature journal article supplement (doi:10.1007/s10694-023-01371-1), 2023-02-08
Supplement: MOESM1 [file 24008274]

|   |   |
|---|---|
| E | C |
| E | C |
| R | C |
| E | C |
| R | C |
| R | C |
| R | C |
| E | C |
| E | C |
| R | C |
| E | C |
| R | C |
| F | C |
| E | C |
| E | C |
| E | C |
| E | C |
| E | C |
| R | C |
| E | C |
| E | C |
| E | C |
| R | C |
| R |   |
| E |   |

|    |
|----|
| 15 |
| 15 |
| 15 |
| 15 |
| 15 |
| 15 |
| 15 |
| 15 |
| 16 |
| 17 |
| 18 |
| 19 |
| 19 |
| 19 |
| 20 |
| 20 |
| 20 |
| 22 |
| 22 |
| 23 |
| 24 |
| 24 |
| 24 |
| 25 |
| 25 |
| 25 |
| 27 |
| 28 |
| 30 |
| 30 |
| 30 |
| 30 |
| 30 |
| 31 |
| 32 |
| 34 |
| 35 |
| 35 |
| 35 |
| 35 |
| 35 |
| 37 |
| 40 |
| 40 |
| 40 |

|     |
|-----|
| 42  |
| 45  |
| 50  |
| 55  |
| 56  |
| 57  |
| 59  |
| 59  |
| 60  |
| 73  |
| 75  |
| 75  |
| 100 |
| 148 |

**Reported  
Evacuation Times  
(mins)**

|    |
|----|
| 0  |
| 5  |
| 9  |
| 9  |
| 10 |
| 11 |
| 12 |
| 12 |
| 13 |
| 14 |
| 14 |
| 14 |

## Appendix B – Results of WUI-NITY and EMS simulations

|                | % of evacuees | DRILL | WUI1 | WUI2 | WUI3 | WUI4  | WUI5 | WUI6 | WUI7  | WUI8 | WUI9 |
|----------------|---------------|-------|------|------|------|-------|------|------|-------|------|------|
| Evac. time (s) | 100%          | 8880  | 6234 | 5410 | 6382 | 6142  | 5466 | 6500 | 6151  | 5274 | 6440 |
|                | 95%           | 4380  | 5266 | 3470 | 4842 | 5399  | 3310 | 4891 | 5246  | 3258 | 4778 |
|                | 99%           | 6000  | 6047 | 5027 | 6086 | 6020  | 5039 | 6301 | 5982  | 4769 | 6120 |
|                | % of evacuees | DRILL | EMS1 | EMS2 | EMS3 | EMS4  | EMS5 | EMS6 | EMS7  | EMS8 | EMS9 |
| Evac. time (s) | 100%          | 8880  | 7580 | 5290 | 9280 | 10310 | 8000 | 9730 | 10680 | 7420 | 9680 |
|                | 95%           | 4380  | 5410 | 4200 | 5050 | 6060  | 4180 | 5440 | 6040  | 4170 | 5470 |
|                | 99%           | 6000  | 7370 | 5090 | 7110 | 9420  | 6080 | 8600 | 10670 | 6720 | 8150 |

|                 | % of evacuees | WUI1 | WUI2 | WUI3 | WUI4 | WUI5 | WUI6 | WUI7 | WUI8 | WUI9 |
|-----------------|---------------|------|------|------|------|------|------|------|------|------|
| Differences (%) | 100%          | -30  | -39  | -28  | -31  | -38  | -27  | -31  | -41  | -27  |
|                 | 95%           | 1    | -16  | 1    | 0    | -16  | 5    | 0    | -21  | 2    |
|                 | 99%           | 20   | -21  | 11   | 23   | -24  | 12   | 20   | -26  | 9    |
|                 | % of evacuees | EMS1 | EMS2 | EMS3 | EMS4 | EMS5 | EMS6 | EMS7 | EMS8 | EMS9 |
| Differences (%) | 100%          | -15  | -40  | 5    | 16   | -10  | 10   | 20   | -16  | 9    |
|                 | 95%           | 23   | -15  | 19   | 57   | 1    | 43   | 78   | 12   | 36   |
|                 | 99%           | 24   | -4   | 15   | 38   | -5   | 24   | 38   | -5   | 25   |

WUI indicates WUI-NITY and EMS indicates the Evacuation Management System. The number indicates the scenario under consideration.
